# Supplementary material
Source: publisher site journal article supplement (https://www.e-cmh.org/upload/media/cmh-2022-0327-Supplementary-Fig-4.pdf)
Supplement: Supplementary file 1 [file cmh-2022-0327-Supplementary-Fig-4.pdf]

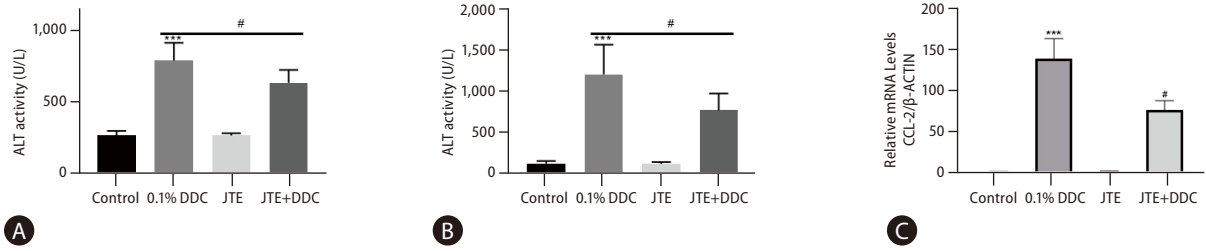

**Supplementary Figure 4.** Pharmacologic inhibition of S1PR2 by JTE-013 alleviates the severity of liver injury in DDC-induced liver fibrosis mice. Serum levels of alanine aminotransferase (ALT, A) and aspartate aminotransferase (AST, B). Hepatic CCL2 (C) mRNA levels on RT-PCR. S1PR2, sphingosine 1-phosphate receptor 2; DDC, 3,5-diethoxycarbonyl-1,4-dihydrocollidine. \*\*\* $P < 0.005$  compared with the control group. # $P < 0.05$  compared with the DDC model group.
